# Supplementary material
Source: PubMed Central journal article supplement (PMC9480970)
Supplement: BLT-20-374_Online_Supplementary_Content.pdf [file BLT-20-374_Online_Supplementary_Content.pdf]

**ONLINE SUPPLEMENTARY CONTENT**

**Table SI - Association of race with transfusion among patients with and without anaemia**

| Database | Anaemia | Race           | Transfusion<br>(n transfused, [% of patients<br>identifying as that race]) | OR (95% CI) for<br>transfusion in Black vs<br>White patients | p for OR >1.00 | p for interaction of<br>anaemia and race on<br>transfusion |
|----------|---------|----------------|----------------------------------------------------------------------------|--------------------------------------------------------------|----------------|------------------------------------------------------------|
| UHS      | No      | Black<br>White | 39 (0.4%)<br>207 (0.3%)                                                    | 1.56 (1.11-2.20)                                             | 0.01           | 0.06                                                       |
|          | Yes     | Black<br>White | 22 (1.6%)<br>78 (1.8%)                                                     | 0.89 (0.55-1.43)                                             | 0.72           |                                                            |
| CSL      | No      | Black<br>White | 484 (1.7%)<br>4,154 (4.4%)                                                 | 0.38 (0.35-0.42)                                             | <0.0001        | <0.0001                                                    |
|          | Yes     | Black<br>White | 210 (3.8%)<br>658 (5.2%)                                                   | 0.72 (0.61-0.84)                                             | <0.0001        |                                                            |
| CR       | No      | Black<br>White | 347 (2.6%)<br>623 (1.6%)                                                   | 1.60 (1.40-1.82)                                             | <0.0001        | 0.007                                                      |
|          | Yes     | Black<br>White | 262 (11.7%)<br>256 (10.2%)                                                 | 1.17 (0.98-1.41)                                             | 0.09           |                                                            |

**Table SII - Association of anaemia with transfusion among Black and White patients**

| Database | Race  | Anemia    | Transfusion*              | OR (95% CI) for transfusion<br>in patients with vs without<br>anaemia | p for OR >1.00   | p for interaction of<br>anaemia and race on<br>transfusion |
|----------|-------|-----------|---------------------------|-----------------------------------------------------------------------|------------------|------------------------------------------------------------|
| UHS      | Black | No<br>Yes | 39 (0.4%)<br>22 (1.6%)    | 3.60 (2.13-6.09)                                                      | <0.0001          | 0.06                                                       |
|          |       | White     | No<br>Yes                 | 207 (0.3%)<br>78 (1.8%)                                               | 6.31 (4.85-8.20) | <0.0001                                                    |
| CSL      | Black | No<br>Yes | 484 (1.7%)<br>210 (3.8%)  | 2.24 (1.90-2.64)                                                      | <0.0001          | <0.0001                                                    |
|          |       | White     | No<br>Yes                 | 4145 (4.4%)<br>658 (5.2%)                                             | 1.19 (1.10-1.30) | <0.0001                                                    |
| CR       | Black | No<br>Yes | 347 (2.6%)<br>262 (11.7%) | 5.07 (4.29-6.00)                                                      | <0.0001          | 0.007                                                      |
|          |       | White     | No<br>Yes                 | 623 (1.6%)<br>246 (10.2%)                                             | 6.91 (5.94-8.04) | <0.0001                                                    |

\*n transfused, (% of patients identifying as that race).

Table SIII - Race and transfusion evaluated by delivery mode

| Database | Delivery mode    | Black | Univariable |                   |         | Multivariable                                |         |
|----------|------------------|-------|-------------|-------------------|---------|----------------------------------------------|---------|
|          |                  |       | n           | Transfusion n (%) | p       | aOR for Transf., Black vs non Black (95% CI) | p       |
| UHS      | Vaginal          | No    | 49,471      | 111 (0.2%)        | 0.21    |                                              |         |
|          |                  | Yes   | 6,206       | 19 (0.3%)         |         | 1.16 (0.70-1.91)                             | 0.57    |
|          | VBAC*            | No    | 497         | 2 (0.4%)          | 0.99    |                                              |         |
|          |                  | Yes   | 94          | 0                 |         | NA <sup>†</sup>                              | 0.87    |
|          | CS <sup>‡</sup>  | No    | 27,279      | 172 (0.6%)        | 0.004   |                                              |         |
|          |                  | Yes   | 3,918       | 42 (1.1%)         |         | 1.22 (0.85-1.75)                             | 0.28    |
|          | Vaginal          | No    | 69,979      | 2,868 (4.1%)      | <0.0001 |                                              |         |
|          |                  | Yes   | 20,908      | 212 (1.0%)        |         | 0.25 (0.21-0.30)                             | <0.0001 |
|          | Vaginal assisted | No    | 6,538       | 401 (6.1%)        | <0.0001 |                                              |         |
|          |                  | Yes   | 1,023       | 16 (1.6%)         |         | 0.24 (0.13-0.44)                             | <0.0001 |
|          | VBAC             | No    | 2,727       | 115 (4.2%)        | <0.0001 |                                              |         |
|          |                  | Yes   | 959         | 13 (1.4%)         |         | 0.40 (0.19-0.82)                             | 0.012   |
|          | CS               | No    | 17,141      | 862 (5.0%)        | 0.02    |                                              |         |
|          |                  | Yes   | 6,666       | 286 (4.3%)        |         | 0.61 (0.50-0.74)                             | <0.0001 |
|          | Repeat CS        | No    | 10,473      | 566 (5.4%)        | 0.006   |                                              |         |
|          |                  | Yes   | 3,910       | 167 (4.3%)        |         | 0.73 (0.57-0.92)                             | 0.008   |
| CR       | Failed VBAC      | No    | 2,956       | 71 (2.4%)         | 0.0002  |                                              |         |
|          |                  | Yes   | 1,839       | 81 (4.4%)         |         | 1.34 (0.91-1.97)                             | 0.14    |
|          | Primary CS       | No    | 16,052      | 460 (2.9%)        | <0.0001 |                                              |         |
|          |                  | Yes   | 7,263       | 295 (4.1%)        |         | 1.18 (0.98-1.41)                             | 0.074   |
|          | Repeat CS        | No    | 22,111      | 348 (1.6%)        | <0.0001 |                                              |         |
|          |                  | Yes   | 6,743       | 233 (3.5%)        |         | 1.49 (1.22-1.83)                             | 0.0001  |

\* VBAC: Vaginal birth after caesarean section. <sup>†</sup>NA: too few events to estimate an OR. <sup>‡</sup>CS: Caesarean section.

**Table SIV - Race and transfusion evaluated by delivery mode, including imputed data**

| Database | Total n (% imputed) | Type of Delivery | Black | n (% imputed)   | Transfusion (n, % of deliveries within demographic) | p       |
|----------|---------------------|------------------|-------|-----------------|-----------------------------------------------------|---------|
| UHS      | 107,138 (18.36%)    | CS               | No    | 34,366 (20.62%) | 220 (0.64%)                                         | 0.0015  |
|          |                     |                  | Yes   | 3,968 (1.26%)   | 44 (1.11%)                                          |         |
|          |                     | Vaginal          | No    | 61,793 (19.14%) | 127 (0.21%)                                         | 0.046   |
|          |                     |                  | Yes   | 6,318 (0.28%)   | 21 (0.33%)                                          |         |
| CR       | 56,964 (0%)         | Primary CS       | No    | 15,917 (0.84%)  | 445 (2.8%)                                          | <0.0001 |
|          |                     |                  | Yes   | 7,398 (1.82%)   | 310 (4.32%)                                         |         |
|          |                     | Repeat CS        | No    | 22,028 (0.38%)  | 340 (1.5%)                                          | <0.0001 |
|          |                     |                  | Yes   | 6,826 (1.22%)   | 241 (3.5%)                                          |         |
| CSL      | 159,107 (11.81%)    | CS               | No    | 31,694 (12.87%) | 1,535 (4.8%)                                        | 0.0002  |
|          |                     |                  | Yes   | 11,505 (8.07%)  | 461 (4.0%)                                          |         |
|          |                     | Vaginal          | No    | 87,711 (9.65%)  | 3,439 (3.9%)                                        | <0.0001 |
|          |                     |                  | Yes   | 23,987 (4.57%)  | 230 (1.0%)                                          |         |

**Table SV - Adjusted associations of transfusion among Black patients compared to non-Black patients using imputed data, stratified by delivery mode**

| Database | Delivery   | aOR  | 95% CI    | p       |
|----------|------------|------|-----------|---------|
| UHS      | CS         | 1.36 | 0.97-1.89 | 0.074   |
|          | Vaginal    | 1.27 | 0.79-2.03 | 0.32    |
| CR       | Primary CS | 1.27 | 1.07-1.50 | 0.007   |
|          | Repeat CS  | 1.51 | 1.25-1.83 | <0.0001 |
| CSL      | CS         | 0.80 | 0.71-0.89 | <0.0001 |
|          | Vaginal    | 0.27 | 0.24-0.31 | <0.0001 |
